# Supplementary material
Source: Springer Nature journal article supplement (https://www.springermedizin.de/resource/supplementary/12889_2010_2899_MOESM5_ESM.pdf/9487608)
Supplement: MOESM5 [file 9487608]

**Parents  
questionnaires**

```
graph TD; A[Parents questionnaires] --> B[Part I: General characteristics]; A --> C[Part II: Parental upbringing in child self-discipline]; C --> D[eating habits]; C --> E[money management]; C --> F[time management];
```

**Part I:**  
General characteristics

**Part II**  
Parental upbringing in child self-discipline

eating  
habits

money  
management

time  
management
